# Supplementary material for: Kinetic modelling of methanol transformation intop-xylene on a 3Zn-3Si/ZSM-5 catalyst
Source: Royal Society of Chemistry journal article supplement (doi:10.1039/d2nj03984b), 2023-01-01
Supplement: d2nj03984b1.pdf [file d2nj03984b1.pdf]

Table S1 Experimental results of MTA reaction kinetics

| T/K    | $\tau$ /h | w(Methanol and DME) | w(Alkane and Olefin) | w(Aromatics (except PX)) | w(PX)  |
|--------|-----------|---------------------|----------------------|--------------------------|--------|
| 623.15 | 0.1       | 0.4009              | 0.0862               | 0.0898                   | 0.4231 |
|        | 0.15      | 0.2593              | 0.1106               | 0.0965                   | 0.5336 |
|        | 0.2       | 0.1530              | 0.1278               | 0.1024                   | 0.6167 |
|        | 0.25      | 0.1158              | 0.1338               | 0.1212                   | 0.6292 |
|        | 0.3       | 0.0083              | 0.0886               | 0.1548                   | 0.7483 |
| 648.15 | 0.1       | 0.3949              | 0.0794               | 0.0830                   | 0.4426 |
|        | 0.15      | 0.2187              | 0.0463               | 0.1059                   | 0.6291 |
|        | 0.2       | 0.0833              | 0.0536               | 0.1401                   | 0.7231 |
|        | 0.25      | 0.0321              | 0.0770               | 0.1881                   | 0.7029 |
|        | 0.3       | 0.0031              | 0.0675               | 0.2168                   | 0.7126 |
| 673.15 | 0.1       | 0.4609              | 0.0388               | 0.1038                   | 0.3966 |
|        | 0.15      | 0.0889              | 0.1016               | 0.1248                   | 0.6847 |
|        | 0.2       | 0.0739              | 0.0443               | 0.1390                   | 0.7428 |
|        | 0.25      | 0.0419              | 0.1023               | 0.1440                   | 0.7118 |
|        | 0.3       | 0.0189              | 0.0375               | 0.1553                   | 0.7884 |
| 698.15 | 0.1       | 0.6739              | 0.0452               | 0.0556                   | 0.2253 |
|        | 0.15      | 0.3339              | 0.0744               | 0.1175                   | 0.4743 |
|        | 0.2       | 0.2260              | 0.0857               | 0.1344                   | 0.5539 |
|        | 0.25      | 0.1173              | 0.0748               | 0.1658                   | 0.6420 |
|        | 0.3       | 0.0480              | 0.0413               | 0.1784                   | 0.7323 |
| 748.15 | 0.1       | 0.4053              | 0.0542               | 0.1064                   | 0.4341 |
|        | 0.15      | 0.2266              | 0.1082               | 0.1293                   | 0.5358 |
|        | 0.2       | 0.0078              | 0.0581               | 0.1476                   | 0.7865 |
|        | 0.25      | 0.0565              | 0.0863               | 0.2664                   | 0.5907 |
|        | 0.3       | 0.0016              | 0.0310               | 0.2225                   | 0.7449 |

## Mass Transfer Calculations for aromatization of methanol upon 3Zn-3Si /ZSM-5 catalyst at 425 °C (0.3 h)

For reaction mode relative to methanol

$$\text{If } \frac{-r'_A \rho_b R n}{k_c C_{Ab}} < 0.15, \text{ then external mass transfer effects can be neglected.}$$

$$-r'_A = \text{reaction rate, kmol/kg-cat} \cdot \text{s} = 2.89 \times 10^{-5}$$

$$n = \text{reaction order} = 2$$

$$R = \text{catalyst particle radius, m} = 4.5 \times 10^{-5}$$

$$\rho_b = \text{bulk density of catalyst bed, kg/m}^3 = 950$$

$$\rho_c = \text{solid catalyst density, kg/m}^3 = 2.6 \times 10^3$$

$$C_{Ab} = \text{bulk gas concentration of A, kmol/m}^3 = 2.59 \times 10^{-2}$$

$$k_c = \text{mass transfer coefficient, m/s} = 0.066 \text{ m/s}$$

$$\frac{-r'_A \rho_b R n}{k_c C_{Ab}} = [2.89 \times 10^{-5} \text{ kmol /kg-cat.s}] [950 \text{ kg/m}^3] [4.5 \times 10^{-5} \text{ m}] [2] / ([0.066 \text{ m/s}] \times [2.59 \times 10^{-2} \text{ kmol/m}^3]) = 1.45 \times 10^{-3} < 0.15 \quad \{\text{Mears for External Diffusion}\}$$

## Weisz-Prater Criterion for Internal Diffusion

$$\text{If } \frac{-r'_{A(\text{obs})} \rho_c R^2}{D_e C_{As}} < 1, \text{ then internal mass transfer effects can be neglected.}$$

$$-r'_{A(\text{obs})} = \text{observed reaction rate, kmol/kg-cat} \cdot \text{s}$$

$$R = \text{catalyst particle radius, m}$$

$$\rho_c = \text{solid catalyst density, kg/m}^3;$$

$$D_e = \text{effective gas-phase diffusivity, m}^2/\text{s}$$

$$C_{As} = \text{gas concentration of A at the catalyst surface, kmol-A/m}^3$$

$$\frac{-r'_{A(\text{obs})} \rho_c R^2}{D_e C_{As}} = [2.89 \times 10^{-5} \text{ kmol/kg-cat.s}] \times [2600 \text{ kg-cat/m}^3] \times [4.5 \times 10^{-5} \text{ m}]^2 / ([2.91 \times 10^{-5} \text{ m}^2/\text{s}] \times [2.59 \times 10^{-2} \text{ kmol/m}^3]) = 2.02 \times 10^{-4} < 1$$

**{Weisz-Prater Criterion for Internal Diffusion}**
